# Supplementary material for: Excellent capture of N2O functioning at RT and lower pressure by utilizing an NaCaA-85 zeolite
Source: Royal Society of Chemistry journal article supplement (doi:10.1039/d4cc00599f), 2024-01-01
Supplement: d4cc00599f1.pdf [file d4cc00599f1.pdf]

**Excellent capture of N<sub>2</sub>O functioning at RT and the lower pressure by utilizing NaCaA-85 zeolite**

S. Hiraki,<sup>1</sup> H. Baba,<sup>1</sup> I. Kobayashi,<sup>1</sup> A. Oda,<sup>1,2</sup> T. Ohkubo,<sup>1</sup> Y. Ikemoto<sup>3</sup>, T. Moriwaki<sup>3</sup> and Y. Kuroda<sup>1</sup>

<sup>1</sup>Department of Chemistry, Graduate School of Natural Science and Technology, Okayama University, 3-1-1 Tsushima-naka, Kita-ku, Okayama 700-8530, Japan.

<sup>2</sup>Department of Materials Chemistry, Graduate School of Engineering, Nagoya University, Furo-cho, Chikusa-ku, Nagoya 464-8603, Japan.

<sup>3</sup>Japan Synchrotron Radiation Research Institute (JASRI), 1-1-1, Kouto, Sayo-cho, Sayo-gun, Hyogo 679-5198, Japan.

**Supplementary Information**

- 1. In connection with the interaction operated in the present system**
- 2. The discussion on the bonding nature of the M–O<sub>L</sub> mode**
- 3. A comparison of adsorption behavior of NaCaA-85 for N<sub>2</sub>O with that for other gases**
- 4. Experimental details**

**Fig. S1: Difference spectrum in Mid IR region in the NaCaA-N<sub>2</sub>O system**

**Fig. S2: Adsorption isotherms of CO<sub>2</sub> and N<sub>2</sub>O on NaCaA-85 for comparison**

**Fig. S3: IR spectra in the  $\nu_3$  mode region of the adsorbed N<sub>2</sub>O molecules on NaCaA-85**

**Fig. S4: Adsorption isotherms of N<sub>2</sub>O on NaSrA-85**

**Fig. S5: Comparison of the adsorption isotherms on both samples: NaSrA-85 and NaCaA-85**

**Fig. S6: Mid IR absorption spectra in respective adsorption processes of N<sub>2</sub>O on NaSrA-85**

**Fig. S7: Plot of change in wave-numbers of  $\nu_1$  and  $\nu_3$  modes for adsorbed N<sub>2</sub>O as a function of equilibrium pressure**

**Fig. S8: Far IR absorption spectra of N<sub>2</sub>O adsorbed on the NaCaA-85 sample**

**Fig. S9: Far IR absorption spectra of N<sub>2</sub>O adsorbed on the NaSrA-85 sample**

**Fig. S10: The resultant structural optimized models with aid of DFT calculation**

**Fig. S11: (a) Adsorption isotherms of N<sub>2</sub>O, CH<sub>4</sub>, N<sub>2</sub> and O<sub>2</sub> on the NaCaA-85 sample and  
(b) Plots of N<sub>2</sub>O/N<sub>2</sub> and N<sub>2</sub>O/CH<sub>4</sub> selectivity observed by use of NaCaA-85 sample.**

**Tab. S1a: Physical parameters of the vapour adsorbates**

**Tab. S1b: Fundamental data of cation**

## 1. In connection with the interaction operated in the present system: the data obtained in the NaSrA-85–N<sub>2</sub>O system and their comparison with those in the NaCaA-85–N<sub>2</sub>O system.

Ionic radius of Ca<sup>2+</sup> is smaller than that of Sr<sup>2+</sup>: **Tab. S1b**. By comparing the adsorption properties of the Sr<sup>2+</sup> ion exchanged A-type zeolite sample with those of the Ca<sup>2+</sup> ion exchanged A-type zeolite sample, we can get the information on the nature of interaction between M<sup>2+</sup> (Ca<sup>2+</sup> or Sr<sup>2+</sup>) exchanged in zeolite with lattice O<sub>L</sub> (lattice oxygen) atom, and also on the adsorption behaviour for N<sub>2</sub>O in both systems. To satisfy these purposes, we carried out the comparison of data with the help of the additional experiments: measurements of adsorption isotherms, mid-IR and far-IR in the NaSrA-85–N<sub>2</sub>O system. On the basis of these experiments, we were aiming at getting the information on the following points:

- a. The vibration modes of both  $\nu_1$  and  $\nu_3$  were expected to be influenced by the strength, as well as the types, of the interaction between exchanged M<sup>n+</sup>-ion and an N<sub>2</sub>O molecule. The important effect caused by the electronic field strength emanating from the Ca<sup>2+</sup>-ion exchanged sample is expected to bring about the appearance of the absorption band of N<sub>2</sub>O at higher wave-number in comparison with case of the exchanged Sr<sup>2+</sup>-ion. In the case of strong adsorption found in this work, the increases in the adsorption amounts may be expected to take place especially in the initial adsorption region.
- b. The electronic field strength due to the exchanged cation also directly affects the vibration mode between exchanged cation and lattice oxygen atom (O<sub>L</sub>): M<sup>2+</sup>–O<sub>L</sub> which is observable in the far-IR region.

### 1-1 Adsorption

It is expected that the larger charge density of the exchanged Ca<sup>2+</sup>-ion strongly interacted with an adsorbed N<sub>2</sub>O molecule, as well as negatively charged lattice oxygen atom or atoms, i.e. [(O<sub>L</sub>)<sub>n</sub>], compared to the case of the exchanged Sr<sup>2+</sup>-ion. On the basis of the results in the text, it seems that there is no specific chemical bonding formation between the exchanged ion and an N<sub>2</sub>O molecule. From the viewpoints of the adsorption features, the exchanged Ca<sup>2+</sup>-ion with radius of 100 pm induces larger induced dipole moment for the adsorbed N<sub>2</sub>O molecules in zeolites, in comparison with the case of the Sr<sup>2+</sup>-ion with ionic radius of 118 pm exchanged sample. First of all, we measured the adsorption isotherms of the NaSrA-85 sample for N<sub>2</sub>O and depicted in **Fig. S4** against the equilibrium pressure. The adsorbed amounts of 8.33, 20.8, 32.9, 63.5, 74 and 93 cm<sup>3</sup> g<sup>-1</sup> at equilibrium pressure of 0.02, 0.1, 0.3, 4, 10 and 37.3 Torr, respectively. These values are compared with the data for NaCaA-85: 9.25, 21.3, 30.1, 56.1, 70 and 94 cm<sup>3</sup> g<sup>-1</sup> at equilibrium pressure of 0.02, 0.1, 0.3, 4, 10 and 37.3 Torr, respectively. To easily understand the difference in the adsorbed amounts in both samples, the data for both samples in the lower pressure regions are also given in the same figures as **Fig. S5**. These data indicate that the adsorbed amounts of the NaSrA-85 sample are slightly lower in the lower equilibrium pressure region, whereas the values for the NaSrA-85 sample are larger than those for the

NaCaA-85 sample from the medium pressures. On the basis of these data, it is not too far from the truth that the difference in the lower pressure region is caused by the difference in the electric field strength operated in the interaction between  $M^{2+}$  and the interacted  $N_2O$  molecule, although it is not to be denied that the additional factor may be associated with the possibility that the distance between the  $Ca^{2+}$  ions is appropriate to form the pinned structure of  $N_2O$  with two kinds of metal ions. The increase in the adsorbed amount observed for NaSrA-85 sample in the higher pressure region may be related to the contribution of polarizability of cation exchanged: **Tab. S1b**. Actually, some authors have reported that Ba-ion exchanged zeolites exhibits excellent adsorption nature for an  $N_2O$  and molecule and also a  $CO_2$  molecule.<sup>1,2</sup>

### ***1-2 Mid IR***

In the lower pressure region, the  $\nu_1$  bands caused by the adsorbed  $N_2O$  molecule on the exchanged metal ions ( $M^{2+}$ - $N_2O$  species) was observed at the value of higher wave-number from the value of gas phase ( $1285\text{ cm}^{-1}$ ), which was observed at  $1302\text{ cm}^{-1}$  for the NaCaA-85 sample and is also higher than that observed for the NaSrA-85- $N_2O$  system, i.e.  $1296\text{ cm}^{-1}$ : **Fig. S6**. As for  $\nu_3$  band, NaCaA-85 gives band at  $2276\text{ cm}^{-1}$  and the band at  $2254\text{ cm}^{-1}$  for NaSrA-85, where the  $\nu_3$  mode of a gaseous molecule appears at  $2223\text{ cm}^{-1}$ . For easy understanding these changes, the wave-numbers in both modes are also plotted as a function of equilibrium pressure in **Fig. S7**. The observation of changes in the shifts from gaseous phase in both cases may be associated with the fact that the position of cations are suitable for the formation of pinned structure of  $N_2O$ . The large changes in the wave-number on adsorption of  $N_2O$  toward higher values are observed both  $\nu_1$  and  $\nu_3$  modes, especially, in the lower equilibrium pressure region from 0 to 0.1 Torr which supports to the formation of the pinned adsorption structure through the respective cations exchanged in different sites. In this region, two kinds of exchanged  $Ca^{2+}$  ions cause “induced dipole moment” in an adsorbed  $N_2O$  molecule, in both  $\nu_1$  (N-O) and  $\nu_3$  (N-N) bands simultaneously, through the interactions with  $Ca^{2+}$  ions positioned in both sides of adsorbed  $N_2O$  molecule. In this adsorption model, it is reasonably explained by considering that the dipole moments were simultaneously induced by two types of the exchanged  $M^{2+}$  ions, resulting in the shifts towards the higher sides in both modes:  $\nu_1$  and  $\nu_3$ . On the other hand, the changing behaviour of both modes in this region is vague in NaSrA-85 sample, although the adsorbed amounts are almost same as that for NaCaA-85 sample. This may be attributable to the presence of some kinds of adsorption modes may be existing in the NaSrA-85 sample, i.e., the effect of polarizability of the cations, and also the exchanged  $Ca^{2+}$  ions occupied more suitable positions for forming the pinned  $N_2O$  species as compared with the case of the NaSrA-85 sample.

## **2. The discussion on the bonding nature of the $M-O_L$ mode based on far-IR data**

The spectra observed in the far-IR region are related to the change in the vibrational modes

between  $M^{2+}$  and  $O_L$  before and after adsorption of  $N_2O$ . Therefore, the far-IR study on zeolite system make it possible to obtain directly the important information on the interaction between the exchanged cation and the lattice oxygen atom ( $O_L$ ). Actually, we carried out *in situ* measurement in the far-IR region for  $N_2O$  adsorption on the NaCaA-85 sample and succeeded in getting information on the  $Ca^{2+}-O_L$  mode as shown in the text and also in **Fig. S8**. Here, we have also performed the Far-IR measurement for the system of NaSrA-85 before and after  $N_2O$  adsorption. However, there is a problem to obtain the information on the  $Sr^{2+}-O_L$  mode directly from the measured spectrum: **Fig. S9a**. This is because the observed bands is difficult to assign this mode correctly from the spectrum. To circumvent this point, we took advantage of getting the difference spectrum before and after  $N_2O$  adsorption on the NaSrA-85 sample: **Fig. S9b**. The bonding nature will be discussed by comparison with the difference spectra obtained in both samples.

In this discussion, we adopted a rough approximation composed of the simple model, i.e., ( $M^{2+}-O_L$ ) pair where  $M^{2+} = Ca^{2+}$  and  $Sr^{2+}$ .

$$\nu \propto \sqrt{\frac{k}{\mu}} \quad (1)$$

where  $k$  means force constant and  $\mu$  reduced mass.

First of all, we assumed that the force constant between ( $M^{2+}-O_L$ ) pair remains constant in both systems. On this assumption, we evaluated by adopting the wave-number of vibration of  $275\text{ cm}^{-1}$  between  $M^{2+}$  and  $O_L$  found in experiment for NaCaA-85. In that case, the wave-number for the  $M^{2+}-O_L$  pair in NaSrA-85 sample is evaluated to be  $253\text{ cm}^{-1}$  by way of the simple model described just above. This value is too large in comparison the value obtained by actual value,  $208\text{ cm}^{-1}$  as shown in **Fig. S8b**. This difference are attributable to the difference in force constants in respective systems. On the basis of this consideration, we can evaluate the difference between two systems: ( $Ca^{2+}-O_L$ ) pair and ( $Sr^{2+}-O_L$ ) pair in the present samples. The relative magnitude in force constants results in the following data; the value for the former is 1.5 times larger than that for the latter. From the remarks obtained in the experiments related to the NaSrA-85 and NaCaA-85 systems, one general point becomes clear; the dominant interaction operated in these systems is caused by the electrostatic field emanated from the exchanged cations. Needless to say, this difference may also include another structural factor; the exchanged cations occupied more suitable positions for the formation of bridged  $N_2O$  species.

### 3. A comparison of adsorption behaviour of NaCaA-85 for $N_2O$ with that for other gases

The most striking aspect of the present result was that the adsorption specificity was only seen in a CaA-type zeolite with the higher exchanging level: NaCaA-85. It is expected that the specific adsorption model proposed in this work endows the NaCaA-85 sample with the discrimination of the

N<sub>2</sub>O molecule against other simple molecules, such as diatomic molecules of N<sub>2</sub> and O<sub>2</sub>, as well as CH<sub>4</sub> with spherical structure in shape, although these molecules have almost similar kinetic diameters: **Tab. S1a**. Such idea leads us to examine the adsorption selectivity for simple molecules: N<sub>2</sub>, O<sub>2</sub> and CH<sub>4</sub>. Shown in **Fig. S11a** are the adsorption isotherms of the NaCaA-85 sample against N<sub>2</sub>, O<sub>2</sub> and CH<sub>4</sub>, respectively. As anticipated, the N<sub>2</sub> and O<sub>2</sub> molecules are scarcely adsorbed on this sample in the equilibrium pressure region from 0 to 100 Torr. CH<sub>4</sub> was also only slightly adsorbed on this sample. This slight increase in the amount may be interpreted by considering the contribution of dispersion force, resulting from the difference in the values of polarizability among three kinds of molecules. Anyway, these adsorption data shown in the figure justify further our proposed model in the specific adsorption of N<sub>2</sub>O onto the NaCaA-85 sample, as well as pave a new way as the separation material for application. □

Thus far, little attention has been drawn to the researches on N<sub>2</sub>O adsorption/separation by use of various types of materials, in comparison with the experiments on CO<sub>2</sub> adsorption/separation. To the best of our knowledge, there are little researches utilizing the efficient N<sub>2</sub>O adsorption materials. Hence, we could hardly find the data focused on the N<sub>2</sub>O selectivity. Under such circumstance, we tried to evaluate the separation selectivity (equilibrium selectivity factor the value of  $\alpha = (V_{N_2O}/V_{CH_4})$  for methane, as well as  $\alpha = (V_{N_2O}/V_{N_2})$  for dinitrogen,  $\alpha = (V_{N_2O}/V_{O_2})$  for dioxygen, where  $V_{N_2O}$  and  $V_{CH_4}$ ,  $V_{N_2}$  and  $V_{O_2}$  are the equilibrium molar adsorption amounts of N<sub>2</sub>O, CH<sub>4</sub>, N<sub>2</sub> and O<sub>2</sub> at given equilibrium pressures. These values were evaluated from the corresponding respective single component isotherms at given equilibrium pressures and given in **Fig. S11b**: [ $\alpha = (V_{N_2O}/V_{CH_4})$ ] as well as another one [ $\alpha = (V_{N_2O}/V_{N_2})$ ]. However, the data on the system (N<sub>2</sub>O and O<sub>2</sub>) were difficult to calculate, because of the adsorbed amounts of O<sub>2</sub> on this sample (NaCaA-85 sample) being too small.

For comparison, we examine our data with those evaluated on the basis of comparable single adsorption data for the selectivity of CO<sub>2</sub>/CH<sub>4</sub> which was reported by some researches, e.g., M. Palomino et al.<sup>3</sup> This fact indicates possible usages of the NaCaA-85 sample for selective adsorption/separation for N<sub>2</sub>O/CH<sub>4</sub>, as well as N<sub>2</sub>O/N<sub>2</sub> or O<sub>2</sub>. In addition, this indication also supports that our system shows prominent separation of N<sub>2</sub>O from the mixture gases including N<sub>2</sub>, O<sub>2</sub> and CH<sub>4</sub>

As the further information, taking into account the fact that the value of  $V_{CO_2}$  are larger than the values of  $V_{N_2O}$  in the present system (see Fig. S2), it may be said that the adsorption selectivity of this sample for CO<sub>2</sub> over CH<sub>4</sub> may deserve special mention.

Finally, the data mentioned in this work indicate the importance of the present system for N<sub>2</sub>O adsorption/separation phenomena which may be useful in the application process. I hope that this work will attract wide attention of researchers working in these fields. The development of adsorbents working efficiently for N<sub>2</sub>O has been becoming an enduring challenge in recent years as discussed in COP28 held in Dubai in 2023.



## 4. Experimental details

**4.1 Materials:** The substitution of  $\text{Si}^{4+}$  in zeolite by  $\text{Al}^{3+}$  results in excess negative charges in the lattice, which are balanced by compensating cations that occupy specific sites. In the present case, the Na form of A-type zeolite (NaA;  $[\text{Na}_{12}(\text{H}_2\text{O})_{27}]_8[\text{Al}_{12}\text{Si}_{12}\text{O}_{48}]_8$ ; Si/Al=1) purchased from Sigma-Aldrich Co., was used as the starting sample for obtaining the  $\text{Ca}^{2+}$ -ion- or  $\text{Sr}^{2+}$ -ion-exchanged sample: (NaCaA, NaSrA). The ion-exchanging operation was carried out at 373 K for 4 h in aqueous solutions of  $\text{Ca}(\text{NO}_3)_2$ , as well as  $\text{Sr}(\text{NO}_3)_2$ , *ca.* 3 g of zeolite was dispersed into an aqueous solution of 0.5 mol/L, 200 mL. This operation was repeated five or seven times to obtain the samples with the desired exchanged capacities. The obtained samples were centrifuged and washed thoroughly with distilled water, followed by drying *in vacuo* at RT. The metal contents in the samples were determined by inductively coupled plasma (ICP) analysis (Varian Vista-Pro CCD Simultaneous ICP-ODS; Seiko Instruments & Varian Instruments). The obtained samples were evaluated to have 85% ion-exchange capacities (called NaCaA-85 and NaSrA-85, respectively). Here, the ion-exchange level (%) was estimated by assuming that one divalent cation is exchanged for two monovalent Na ions. We also used the purchased sample (CaA) from Sigma-aldrich Co. as the reference standard sample. The ion exchange capacity of this sample is evaluated by our group to be 78%: abbreviated as CaA-78, where the last number indicates the ion exchange capacity. The following gases used in this work were purchased from GL Sciences Co. (Tokyo, JP):  $\text{N}_2\text{O}$  (99.5%),  $\text{CH}_4$  (99.9%),  $\text{N}_2$  (99.99%) and  $\text{O}_2$  (99.9%).

**4.2 Adsorption measurements:** The adsorption isotherms of  $\text{N}_2\text{O}$  at 298 K were obtained volumetrically using a volumetric adsorption apparatus equipped with an MKS Baratron pressure sensor (type 390). The 1<sup>st</sup> adsorption measurement was performed at 298 K on respective samples treated at 723 K for 4 h under a reduced pressure of 1.3 mPa. After the first run, the samples were re-evacuated at 298 K for 4 h, followed by measurement of the second adsorption at 298 K. The difference in adsorbed amounts between 1<sup>st</sup> and 2<sup>nd</sup> adsorption isotherms indicates the existence of the strongly adsorbed species.

**4.3 (1) Mid-IR spectra:** The IR spectra were recorded at RT on a Digilab FTS-4000 spectrophotometer with a mercury cadmium telluride (MCT) detector kept at the temperature of liquid  $\text{N}_2$  (accumulation: 256 scans; nominal resolution of  $2\text{ cm}^{-1}$ ) in the region between 4000–800  $\text{cm}^{-1}$  in the transmission mode at RT for the self-supported sample by using an *in situ* cell developed by our group. The powdered sample was pressed into a pellet of 10 mm in diameter, and thus prepared disk was loaded into an IR cell that is capable of *in situ* treatment under a reduced pressure of 1 mPa and also consecutive *in situ* gas dosage.<sup>4</sup> Prior to IR measurements, the sample was first evacuated at 723 K to produce the standard state of the sample, followed by cooling to RT in the *in situ* condition. In addition, to get into the information on the adsorbed states of  $\text{N}_2\text{O}$  under various equilibrium pressure regions from lower pressure of 0.1 Torr to medium pressure of *ca.* 5 Torr at RT. All spectra

given in figures are depicted as the difference spectra between respective spectra for the N<sub>2</sub>O adsorbed under various equilibrium-pressures and a spectrum of gas phase only.

**(2) Far-IR spectra:** In this work, we focused on the exchanged cation-framework vibrational modes being observable in the far-IR region and their shifts upon N<sub>2</sub>O adsorption. There are some difficulties in obtaining the detailed information from the far-IR region based on the experimental viewpoint. We designed *in situ* cell which was available in vacuum and the *in situ* condition after evacuating at higher temperatures and also in consecutive gas dosages. Furthermore, to obtain the information with high sensitivity on the role of exchanged Ca<sup>2+</sup> or Sr<sup>2+</sup> ions for the specific N<sub>2</sub>O adsorption observed in the NaCaA-85 as well as NaSrA-85 samples at RT, we measured far-IR spectra in this system by taking advantage of SOR light, which is bright compared with the conventional IR sources, leading to the precise detection of the definitive change in the cation-vibrational modes of the Ca<sup>2+</sup>- or Sr<sup>2+</sup>-zeolite lattice vibrations through the adsorption of N<sub>2</sub>O at RT. The measurements in the far-IR region were performed by using the BL43-IR beam line at the SPring-8 facility (Harima, Hyogo Prefecture, Japan) and using the spectrometer Bruker IFS 120 HR (Detector TGS). The Mylar 3.5 μm beam splitter was used in this work, as it was suitable for the spectral regions required here.<sup>5</sup>

#### 4.4 Computational methodology (calculation method)

**(1) Calculation conditions.** DFT cluster calculations were conducted using the Gaussian 09 program. All calculations were performed at the B3LYP/6-31G(d,p) level with the SCF convergence criterion of 10<sup>-8</sup> au.

**(2) Models.**

(2-1). *Dual Ca<sup>2+</sup> site:* The DFT cluster model of the local environment of a type-A zeolite, i.e., Al<sub>4</sub>Si<sub>11</sub>O<sub>16</sub>H<sub>28</sub> geometry that includes the 4MR, 6MR and 8MR sites, was adopted on the basis of the crystallographic data. To meet the charge compensation requirement from the zeolite framework, two Ca ions were placed at the 6MR and 8MR position as counter cations. Geometrical optimization was performed on the coordinates of all atoms except for the framework Si atoms, through which we obtained the cluster model that represents the dual Ca<sup>2+</sup> sites located at the 6MR and 8MR positions: [<sup>8MR</sup>Ca, <sup>6MR</sup>Ca]-Al<sub>4</sub>Si<sub>11</sub>O<sub>16</sub>H<sub>28</sub>. This model is the same one used in our preceding work.<sup>6</sup>

(2-2). *N<sub>2</sub>O adsorbed on the dual Ca<sup>2+</sup> site:* An N<sub>2</sub>O molecule was placed close to a dual Ca<sup>2+</sup> site, and the coordinates of all atoms except for the framework Si atoms were optimized. In this optimization process, two local minima were found. One is the N<sub>2</sub>O molecule adsorbed on both two Ca ions in a bridge style: [<sup>8MR</sup>Ca(N<sub>2</sub>O)<sup>6MR</sup>Ca]-Al<sub>4</sub>Si<sub>11</sub>O<sub>16</sub>H<sub>28</sub>. Other models were the N<sub>2</sub>O molecule adsorbed on only the Ca ion sitting at the 8MR position and also at the 6MR position, respectively: [<sup>8MR</sup>Ca(N<sub>2</sub>O), <sup>6MR</sup>Ca]-Al<sub>4</sub>Si<sub>11</sub>O<sub>16</sub>H<sub>28</sub> and at the 6MR position [<sup>8MR</sup>Ca, <sup>6MR</sup>Ca(N<sub>2</sub>O)]-Al<sub>4</sub>Si<sub>11</sub>O<sub>16</sub>H<sub>28</sub> cluster models. All the geometries are given in **Fig. S-10**.



(2-3). Vibrational frequency calculations. To reproduce the mid- and far-IR spectra upon the process of N<sub>2</sub>O adsorption on the [<sup>8</sup>MRCa, <sup>6</sup>MRCa]-Al<sub>4</sub>Si<sub>11</sub>O<sub>16</sub>H<sub>28</sub> cluster model, vibrational frequency calculations were performed on the [<sup>8</sup>MRCa, <sup>6</sup>MRCa]-Al<sub>4</sub>Si<sub>11</sub>O<sub>16</sub>H<sub>28</sub>, [<sup>8</sup>MRCa(N<sub>2</sub>O)<sup>6</sup>MRCa]-Al<sub>4</sub>Si<sub>11</sub>O<sub>16</sub>H<sub>28</sub>, [<sup>8</sup>MRCa(N<sub>2</sub>O), <sup>6</sup>MRCa]-Al<sub>4</sub>Si<sub>11</sub>O<sub>16</sub>H<sub>28</sub>, and [<sup>8</sup>MRCa, <sup>6</sup>MRCa(N<sub>2</sub>O)]-Al<sub>4</sub>Si<sub>11</sub>O<sub>16</sub>H<sub>28</sub> cluster models. In these calculations, terminated H atoms were kept frozen.

(2-4). *Adsorption energy calculations.* The pre-optimized geometries were used. Then, dispersion correction was included by single-point energy calculations at B3LYP/6-31G(d,p) with empirical dispersion GD3.<sup>7</sup> Adsorption energy was defined as the following equation:  $E_{\text{ads}} = E[\text{site-N}_2\text{O}] - E[\text{site}] - E[\text{N}_2\text{O}]$ , where  $E[\text{site-N}_2\text{O}]$ ,  $E[\text{site}]$  and  $E[\text{N}_2\text{O}]$  mean the energy of the N<sub>2</sub>O-adsorbed site, the site with no N<sub>2</sub>O adsorption and free N<sub>2</sub>O molecule.  $E_{\text{ads}}$  for the respective adsorption modes were summarized in **Table given below**.

In order to obtain the additional justification of the adsorption model, we tried to use these data. Contrary to expectations, the most stable adsorption mechanism was (<sup>8</sup>MRCaN<sub>2</sub>O, <sup>6</sup>MRCa); adsorption at the 8MR site was stable in comparison with that for the bridge adsorption mechanism (<sup>8</sup>MRCaN<sub>2</sub>O<sup>6</sup>MRCa) by *ca.* 1 kJ/mol. However, we must insist here that this energy difference is within the error of the DFT calculation method. Therefore, we consider that the energy differences shown in **Table** are not sufficient to discuss the superiority of each adsorption site for N<sub>2</sub>O.

**Table** DFT-predicted  $E_{\text{ads}}$  for the respective adsorption mechanisms.

| Adsorption mode                                        | $E_{\text{ads}}$ (kJ/mol) |
|--------------------------------------------------------|---------------------------|
| <sup>8</sup> MRCa(N <sub>2</sub> O) <sup>6</sup> MRCa  | <b>-84.2</b>              |
| <sup>8</sup> MRCa(N <sub>2</sub> O), <sup>6</sup> MRCa | <b>-85.4</b>              |
| <sup>8</sup> MRCa, <sup>6</sup> MRCa(N <sub>2</sub> O) | <b>-77.9</b>              |

Fig. S1. S. Hiraki et al.,

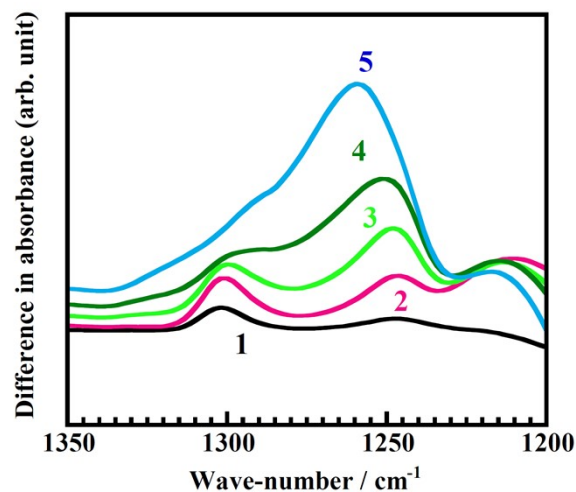

**Fig. S1:** Difference spectra in the symmetric  $\nu_1$  fundamental vibration region of the adsorbed N<sub>2</sub>O molecules on the NaCaA-85 sample at increasing equilibrium pressures from 0 to 4.9 Torr. All spectra are the difference between respective states and spectrum of the spectrum evacuated at 723 K. The NaCaA-85 sample equilibrated with N<sub>2</sub>O at (1) 0.04 Torr, (2) 0.10 Torr, (3) 0.70 Torr, (4) 1.4 Torr and (4) 4.9 Torr, respectively. All measurements were performed at RT.

Fig. SI-2. S. Hiraki et al.,

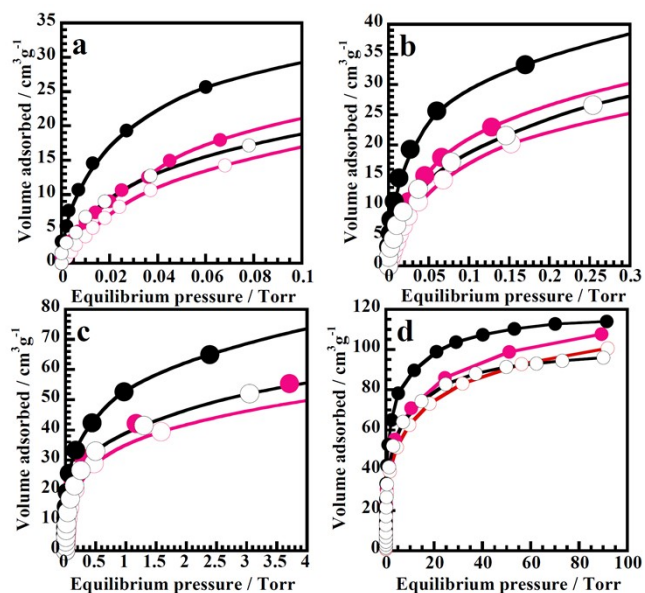

**Fig. S2:** The 1<sup>st</sup> (solid marks) and 2<sup>nd</sup> (open marks) adsorption isotherms of both CO<sub>2</sub> (Black) and N<sub>2</sub>O (Red) at 298 K on the NaCaA-85 sample: pressure region between (a) 0–0.1 Torr; (b) 0–0.3 Torr; (c) 0–4 Torr; (d) 0–100 Torr.

Fig. S3. S. Hiraki et al.,

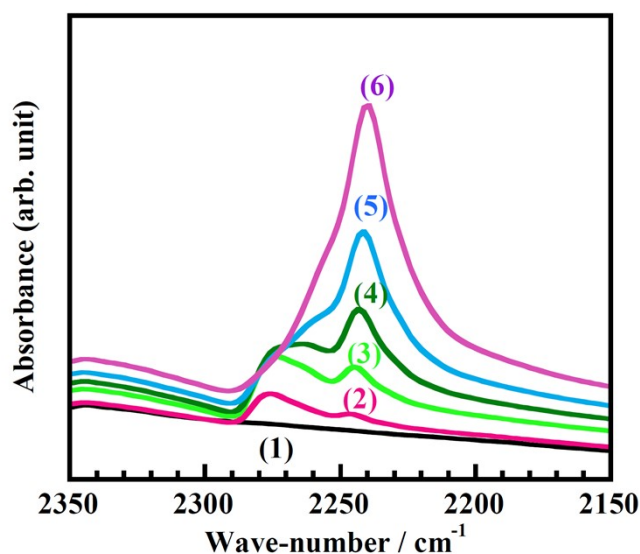

**Fig. S3:** The MID-IR absorption spectra of the adsorbed N<sub>2</sub>O molecules on the NaCaA-85 sample at increasing equilibrium pressures from 0 to 4.9 Torr in the asymmetric  $\nu_3$  fundamental vibration: the N-N(-O) mode. The NaCaA-85 sample was first (1) evacuated at 723 K; followed by equilibrating with N<sub>2</sub>O at (2) 0.04 Torr; (3) 0.10 Torr; (4) 0.70 Torr; (5) 1.4 Torr; (6) 4.9 Torr, respectively. All measurements were performed at RT.

With reference to the  $\nu_3$  (N-N stretching) band region of N<sub>2</sub>O, the major band first appeared at 2276 cm<sup>-1</sup> accompanying by the weak band at 2245 cm<sup>-1</sup> in the initial adsorption stage. With further increase in the equilibrium pressure to 4.9 Torr, the first band gradually shifted toward lower wave-number side and the band at 2245 cm<sup>-1</sup> increases its intensity. Taking into accounts of the equilibriums pressure, the former band is characteristic for this sample and assigned to the adsorbed N<sub>2</sub>O molecule peculiarly formed on the present sample. The latter band is attributed to the physisorbed N<sub>2</sub>O species. Although the comparable IR data are sparse, the reported IR data as far as we know are as follows; 2241 cm<sup>-1</sup> for BaFAU, 2237 cm<sup>-1</sup> for CaFAU, 2234 cm<sup>-1</sup> for MgFAU, 2238 cm<sup>-1</sup> for BaCHA, 2236 cm<sup>-1</sup> for CaCHA, 2230 cm<sup>-1</sup> for CaFAU(Y), 2240 cm<sup>-1</sup> for MgMOR: where FAU, CHA and MOR mean the types of zeolites: Faujasite, Chabazite and Mordenite type zeolites, respectively.<sup>1,8</sup> The 2276 cm<sup>-1</sup> band observed in our case is the highest value thus far reported, indicating that the characteristic adsorption takes place in our system, i.e. strongly adsorbed N<sub>2</sub>O species is formed in this system in harmony with the isotherm data (Fig.1).

Fig. S4. S. Hiraki et al.,

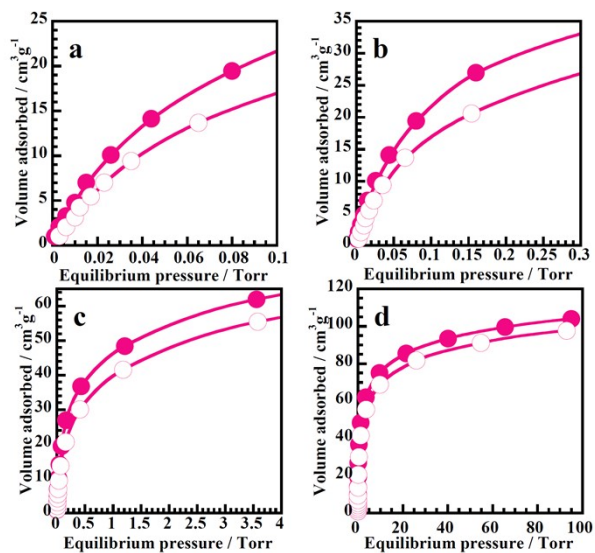

**Fig. S4:** The 1<sup>st</sup> (solid marks) and 2<sup>nd</sup> (open marks) adsorption isotherms of N<sub>2</sub>O at 298 K on the NaSrA-85 sample: pressure region between (a) 0–0.1 Torr; (b) 0–0.3 Torr; (c) 0–4 Torr; (d) 0–100 Torr.

Fig. S5. S. Hiraki et al.,

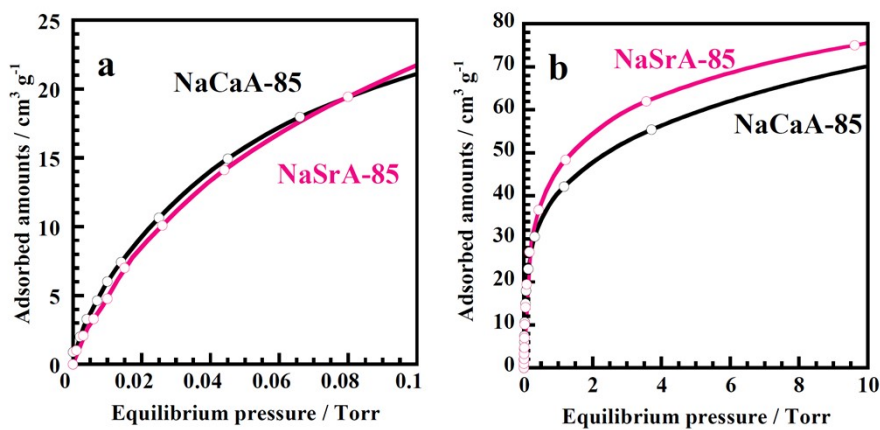

**Fig. S5:** Comparison of the adsorption isotherms of N<sub>2</sub>O on both NaSrA-85 and NaCaA-85 (Isotherms): (a) 0–0.1 Torr and (b) 0–10 Torr.

Fig. S6. S. Hiraki et al.,

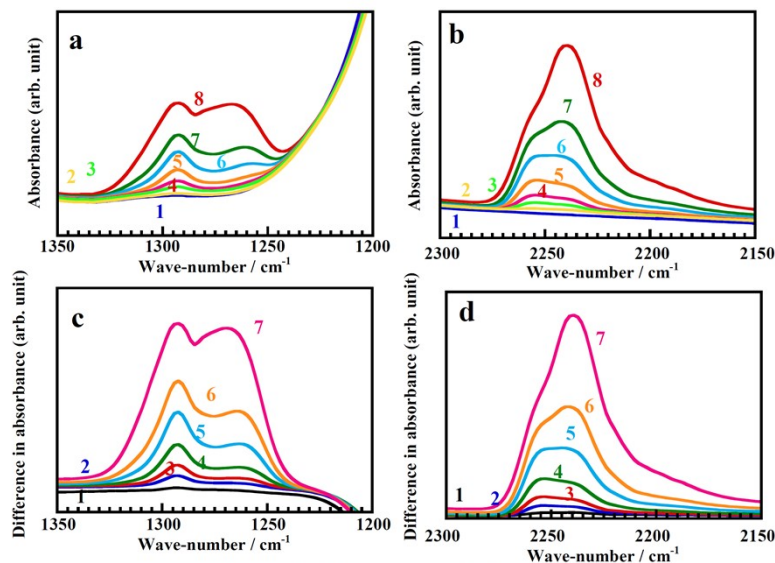

Fig. S6: Mid IR absorption spectra in respective adsorption processes of  $N_2O$  on NaSrA-85: (a)  $\nu_1$  region and (b)  $\nu_3$  region. The sample was (1) evacuated at 723 K, followed by equilibrated with  $N_2O$  under various pressures of (2) 0.007 Torr, (3) 0.01 Torr, (4) 0.04 Torr, (5) 1 Torr, (6) 3 Torr, (7) 6 Torr, (8) 21 Torr. The difference spectra between respective adsorption stages and 723 K-evacuated sample: in the (c)  $\nu_1$  region and (d)  $\nu_3$  region. Difference spectra between spectrum measured under respective pressures and 723 K: (1) 0.007 Torr, (2) 0.01 Torr, (3) 0.04 Torr, (4) 1 Torr, (5) 3 Torr, (6) 6 Torr and (7) 21 Torr.

Fig. S7. S. Hiraki et al.,

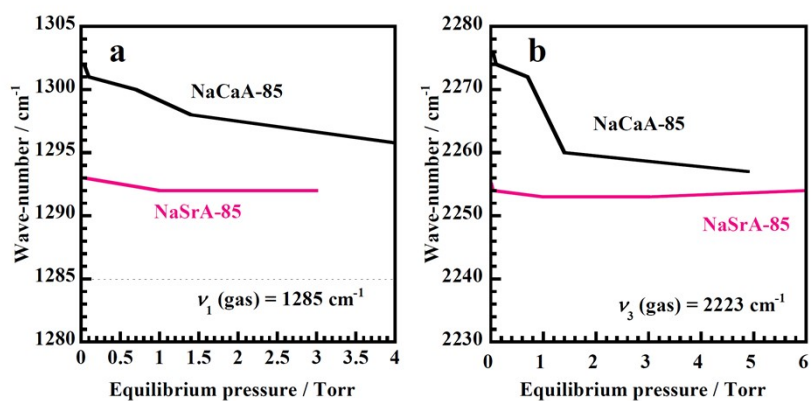

Fig. S7: Plot of change in wave-numbers of  $N_2O$  observed in the (a)  $\nu_1$  and (b)  $\nu_3$  modes as a function of equilibrium pressure.

Fig. S8. S. Hiraki et al.,

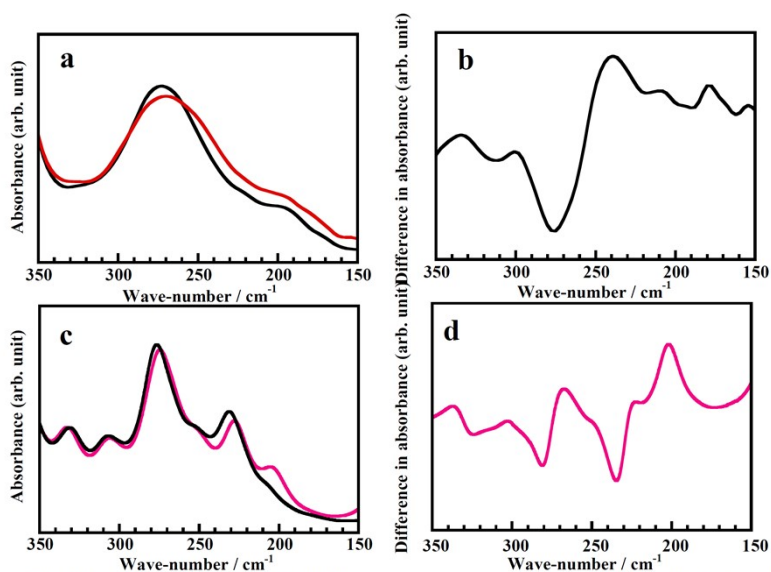

**Fig. S8:** Far IR absorption spectra of the NaCaA-85 sample. Experimental measurements were performed at RT and under in situ condition. (a) First, the NaCaA-85 sample was evacuated at 723 K: **Black** line. After this treatment, this sample was equilibrated with N<sub>2</sub>O under the pressure of 5 Torr: **Red** line. (b) The difference spectrum between them. For comparison, (c) the spectra obtained with the aid of DFT calculation: **Black** line, before N<sub>2</sub>O adsorption and **Red** line, after N<sub>2</sub>O adsorption. (d) The difference in calculated spectra in Far IR region before and after N<sub>2</sub>O adsorption in the NaCaA-85-N<sub>2</sub>O system.

Fig. S9. S. Hiraki et al.,

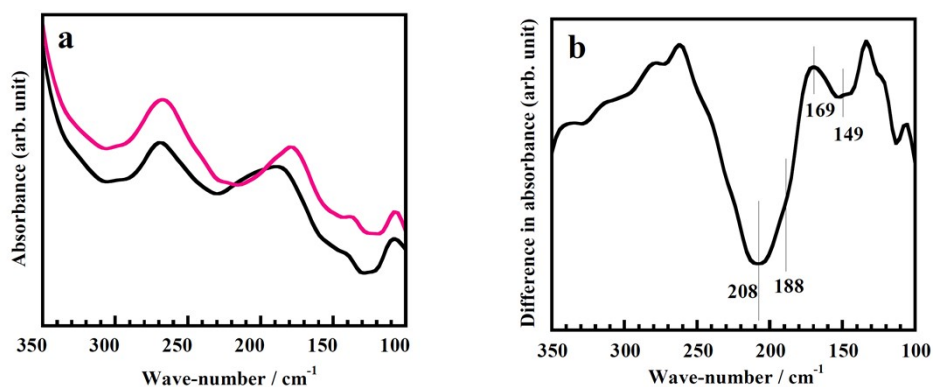

**Fig. S9:** Far IR absorption spectra and their difference spectrum of the NaSrA-85 sample: (a) before (**Black**) and after (**Red**) N<sub>2</sub>O adsorption, and (b) their difference spectrum.

Fig. S10. S. Hiraki et al.,

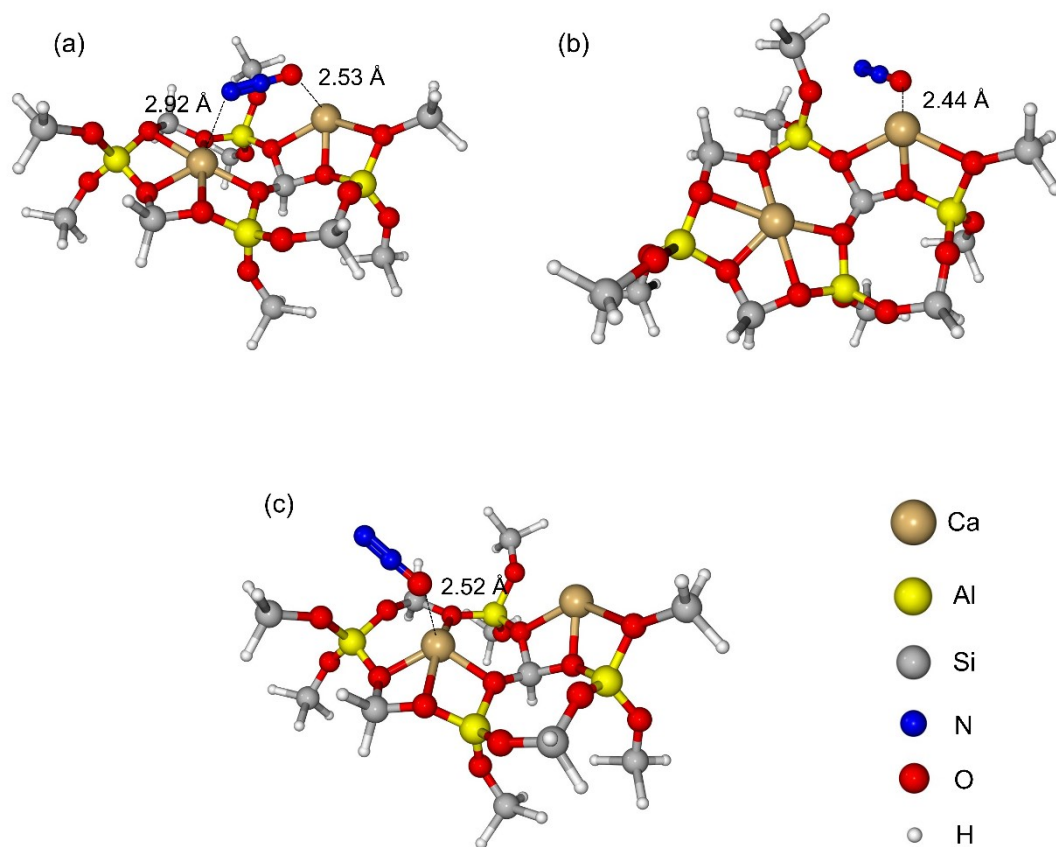

Fig. S10. Resultant optimized geometries of  $\text{N}_2\text{O}$  adsorbed on the respective sites through the DFT calculation: (a)  $[\text{}^8\text{MR}\text{Ca}(\text{N}_2\text{O})\text{}^6\text{MR}\text{Ca}]\text{-Al}_4\text{Si}_{11}\text{O}_{16}\text{H}_{28}$ , (b)  $[\text{}^8\text{MR}\text{Ca}(\text{N}_2\text{O}), \text{}^6\text{MR}\text{Ca}]\text{-Al}_4\text{Si}_{11}\text{O}_{16}\text{H}_{28}$  and (c)  $[\text{}^8\text{MR}\text{Ca}, \text{}^6\text{MR}\text{Ca}(\text{N}_2\text{O})]\text{-Al}_4\text{Si}_{11}\text{O}_{16}\text{H}_{28}$ .

Fig. S11a. S. Hiraki et al.,

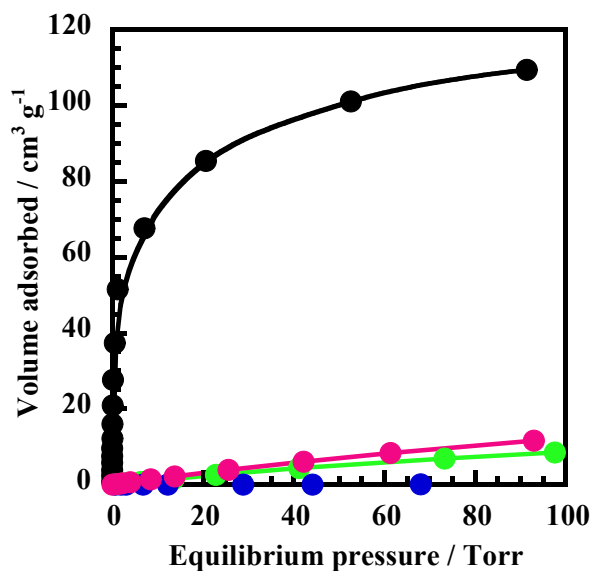

Fig. S11a. Included in this figure for comparison are adsorbed amounts on the NaCaA-85 sample measured at 298 K for various gases; N<sub>2</sub>O (Black), CH<sub>4</sub> (Red), N<sub>2</sub> (Green) and O<sub>2</sub> (Blue), respectively.

Fig. S11b. S. Hiraki et al.,

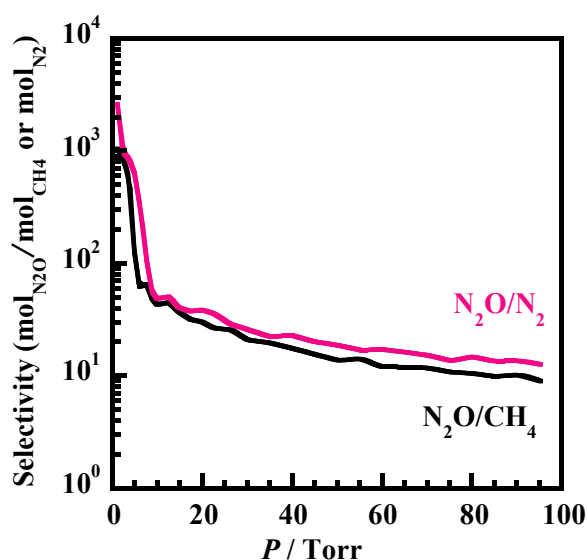

Fig. S11b. Plots of N<sub>2</sub>O/N<sub>2</sub> and N<sub>2</sub>O/CH<sub>4</sub> selectivity against equilibrium pressures utilizing the NaCaA-85 sample.



Tab. S1a. S. Hiraki et al.,

Table SI-1a: Physical parameters of the vapour adsorbates

| Molecule         | Kinetic diameter / Å | Polarizability / $10^{-25}$ cm <sup>3</sup> | Dipole moment / $10^{-18}$ esu cm | Quadrupole moment / $10^{-26}$ esu cm <sup>2</sup> |
|------------------|----------------------|---------------------------------------------|-----------------------------------|----------------------------------------------------|
| N <sub>2</sub> O | 3.30                 | 30.3                                        | 0.16083                           | —                                                  |
| CO <sub>2</sub>  | 3.3 — 3.9            | 29.11                                       | 0                                 | 4.30                                               |
| CH <sub>4</sub>  | 3.785                | 25.93                                       | 0                                 | 0                                                  |
| N <sub>2</sub>   | 3.64—3.80            | 17.403                                      | 0                                 | 1.52                                               |
| O <sub>2</sub>   | 3.467                | 15.812                                      | 0                                 | 0.39                                               |
| H <sub>2</sub>   | 2.827—2.89           | 8.042                                       | 0                                 | 0.662                                              |
| CO               | 3.690                | 19.5                                        | 0.1098                            | 2.50                                               |
| NO               | 3.492                | 17.0                                        | 0.15872                           | —                                                  |
| H <sub>2</sub> O | 2.641                | 14.5                                        | 1.8546                            | —                                                  |

J.-R. Li, R. J. Kuppler and H.-C. Zhou, Selective gas adsorption and separation in metal-organic frameworks. Chem. Soc. Rev., 2009, 38, 1477–1504.

Tab. S1b. S. Hiraki et al.,

Table SI-1b: Fundamental data of cations.

| Molecule         | Polarizability / $10^{-25}$ cm <sup>3</sup> | Ionic Radius of Cation / pm | Polarizing Power of Cation ( $Q/r^2$ ) / $10^{-24}$ C m <sup>-2</sup> |
|------------------|---------------------------------------------|-----------------------------|-----------------------------------------------------------------------|
| Na <sup>+</sup>  | 1.8                                         | 12                          | 15.4                                                                  |
| Mg <sup>2+</sup> | 0.72                                        | 72                          | 61.8                                                                  |
| Ca <sup>2+</sup> | 4.71                                        | 100                         | 32.0                                                                  |
| Sr <sup>2+</sup> | 8.63                                        | 118                         | 19.6                                                                  |
| Ba <sup>2+</sup> | 15.6                                        | 135                         | 17.6                                                                  |

V. Dimitrov, T. Komatsu, J. Solid State Chem. 2012, 196, 574-578.

## References in SI section

1. B. Yue, X. Lian, S. Liu, G. Wu, J. Xu and L. Li, Efficient nitrous oxide capture by cationic forms of FAU and CHA zeolites, *Chem. Eng. J.*, 2023, **462**, 142300. This paper is same as the reference 16 in the text.
2. A. Itadani, A. Oda, H. Torigoe, T. Ohkubo, M. Sato, H. Kobayashi and Y. Kuroda, Material Exhibiting Efficient CO<sub>2</sub> Adsorption at Room Temperature for Concentrations Lower Than 1000 ppm: Elucidation of the State of Barium-Ion Exchanged in an MFI-Type Zeolite. *ACS Appl. Mater. Interfaces*, 2016, **8**, 8821–8833.
3. M. Palomino et al., Zeolite Rho: a highly selective adsorbent for CO<sub>2</sub>/CH<sub>4</sub> separation induced by a structural phase modification. *Chem Commun.*, 2012, **48**, 215-217.
4. Y. Kuroda, H. Maeda and T. Morimoto, *In situ* sample cell for EXAFS measurements on materials treated at elevated temperatures in vacuo. *Rev. Sci. Instrum.*, 1989, **60**, 3083–3085.
5. Y. Ikemoto, T. Moriwaki, T. Nakano and Y. Nozue, Far infrared microspectroscopy of zeolite MOR single crystal. *Infrared Phys. Techn.*, 2006, **49**, 78–81.
6. A. Oda, S. Hiraki, E. Harada, I. Kobayashi, T. Ohkubo, Y. Ikemoto, T. Moriwaki and Y. Kuroda, Unprecedented CO<sub>2</sub> adsorption behavior by 5A-type zeolite discovered in lower pressure region and at 300 K. *J. Mater. Chem. A*, 2021, **9**, 7531–7545. This paper is same as the reference 6 in the text.
7. S. Grimme, J. Antony, S. Ehrlich and H. Krieg, *J. Chem. Phys.*, 2010, **132**, 154104.
8. A. L. Kustov and L. M. Kustov, IR-Spectroscopic Study of Complex Formation of Nitrogen Oxides (NO, N<sub>2</sub>O) with Cationic Forms of Zeolites and the Reactivity of Adsorbed Species in CO and CH<sub>4</sub> Oxidation, *Molecules*, 2022, **27**, 55. This paper is same as the reference 19 in the text.
